# Supplementary material for: Serum 25-Hydroxyvitamin D Status and Vitamin D Supplements Use Are Not Associated with Low Back Pain in the Large UK Biobank Cohort
Source: MDPI journal article supplement (doi:10.3390/nu16060806), 2024-03-12
Supplement: s1 [file s1]

## Supplemental Materials

### Table of Contents

|                                                                                                                                                             |    |
|-------------------------------------------------------------------------------------------------------------------------------------------------------------|----|
| Table S1. List of baseline characteristics adjusted for in the analyses on vitamin D status and vitamin D supplementation.....                              | 2  |
| Table S2. Distribution of full list of baseline characteristics of the study population in the cross-sectional and longitudinal analyses .....              | 3  |
| Table S3. Cross-sectional association of covariates with low back pain at baseline.....                                                                     | 6  |
| Table S4. Subgroup analyses on the associations of vitamin D deficiency and insufficiency with low back pain, cross-sectionally and longitudinally .....    | 9  |
| Table S5. Subgroup analyses on the associations of vitamin D supplement and multivitamin use with low back pain, cross-sectionally and longitudinally ..... | 10 |

**Table S1.** List of baseline characteristics adjusted for in the analyses on vitamin D status and vitamin D supplementation.

| Variables                                                         | Covariate in the<br>Analyses on Vitamin D<br>Status (n = 27) | Covariate in the<br>Analyses on Vitamin D<br>Supplementation (n = 30) |
|-------------------------------------------------------------------|--------------------------------------------------------------|-----------------------------------------------------------------------|
| <b>SOCIO-DEMOGRAPHIC/-ECONOMIC FACTORS</b>                        |                                                              |                                                                       |
| Age                                                               | Yes                                                          | Yes                                                                   |
| Sex                                                               | Yes                                                          | Yes                                                                   |
| Education                                                         | Yes                                                          | No                                                                    |
| Annual household income                                           | Yes                                                          | Yes                                                                   |
| <b>LIFE-STYLE FACTORS</b>                                         |                                                              |                                                                       |
| Smoking                                                           | Yes                                                          | Yes                                                                   |
| Venturesome personality                                           | No                                                           | Yes                                                                   |
| Total physical activity                                           | Yes                                                          | Yes                                                                   |
| <b>DISEASES &amp; DISEASE SYMPTOMS</b>                            |                                                              |                                                                       |
| Diabetes                                                          | Yes                                                          | Yes                                                                   |
| Stroke                                                            | Yes                                                          | Yes                                                                   |
| Coronary heart disease                                            | Yes                                                          | Yes                                                                   |
| Hypertension                                                      | No                                                           | Yes                                                                   |
| Tiredness/lethargy in last 2 weeks                                | Yes                                                          | Yes                                                                   |
| Depressed mood                                                    | Yes                                                          | Yes                                                                   |
| History of depression                                             | No                                                           | Yes                                                                   |
| History of musculoskeletal disease                                | Yes                                                          | Yes                                                                   |
| History of injury to abdomen, lower back, lumbar spine and pelvis | Yes                                                          | Yes                                                                   |
| Cancer                                                            | No                                                           | Yes                                                                   |
| <b>BIOMARKERS</b>                                                 |                                                              |                                                                       |
| Body mass index                                                   | Yes                                                          | Yes                                                                   |
| Systolic blood pressure                                           | Yes                                                          | No                                                                    |
| Forced expiratory volume in 1-second                              | Yes                                                          | No                                                                    |
| Hand grip strength                                                | Yes                                                          | No                                                                    |
| <b>GENERAL HEALTH</b>                                             |                                                              |                                                                       |
| Disability                                                        | Yes                                                          | Yes                                                                   |
| General self-reported health                                      | Yes                                                          | Yes                                                                   |
| No of chronic diseases                                            | Yes                                                          | Yes                                                                   |
| No of drugs                                                       | Yes                                                          | Yes                                                                   |
| Low-dose aspirin use                                              | No                                                           | Yes                                                                   |
| Lipid-lowering drugs use                                          | No                                                           | Yes                                                                   |
| Anti-depressants use                                              | No                                                           | Yes                                                                   |
| <b>VITAMIN D SPECIFIC FACTORS</b>                                 |                                                              |                                                                       |
| Latitude of study center                                          | Yes                                                          | Yes                                                                   |
| Month of attending the study center                               | Yes                                                          | Yes                                                                   |
| Time spent outdoors in summer                                     | Yes                                                          | Yes                                                                   |
| Skin color brown/black                                            | Yes                                                          | Yes                                                                   |
| Ease of skin tanning                                              | Yes                                                          | Yes                                                                   |
| Solarium/sunlamp use                                              | Yes                                                          | Yes                                                                   |

**Table S2.** Distribution of full list of baseline characteristics of the study population in the cross-sectional and longitudinal analyses.

| <b>Variables</b>                                          | <b>Cross-Sectional<br/>Analysis<br/>N(%)<sup>b</sup>/Median (IQR)</b> | <b>Longitudinal<br/>Analysis <sup>a</sup><br/>N(%)<sup>b</sup>/Median (IQR)</b> |
|-----------------------------------------------------------|-----------------------------------------------------------------------|---------------------------------------------------------------------------------|
| <b>N<sub>total</sub></b>                                  | 135,934                                                               | 130,843                                                                         |
| <b>SOCIO-DEMOGRAPHIC/-ECONOMIC FACTORS</b>                |                                                                       |                                                                                 |
| <b>Age (years), median (IQR)</b>                          | 58 (50; 63)                                                           | 58 (50; 63)                                                                     |
| <b>Sex, n (%)</b>                                         |                                                                       |                                                                                 |
| Female                                                    | 73,427 (54.0)                                                         | 70,690 (54.0)                                                                   |
| Male                                                      | 62,507 (46.0)                                                         | 60,153 (46.0)                                                                   |
| <b>Education (years), median (IQR)</b>                    | 12 (10; 17)                                                           | 12 (10; 17)                                                                     |
| <b>Annual household income (£), n (%)</b>                 |                                                                       |                                                                                 |
| < 18,000                                                  | 25,666 (18.9)                                                         | 24,310 (18.6)                                                                   |
| 18,000 - < 51,999                                         | 61,611 (45.3)                                                         | 59,470 (45.5)                                                                   |
| 52,000 - < 100,000                                        | 24,065 (17.7)                                                         | 23,431 (17.9)                                                                   |
| ≥ 100,000                                                 | 6269 (4.6)                                                            | 6141 (4.7)                                                                      |
| <b>LIFESTYLE FACTORS</b>                                  |                                                                       |                                                                                 |
| <b>Smoking, n (%)</b>                                     |                                                                       |                                                                                 |
| Never                                                     | 76,907 (56.6)                                                         | 74,471 (56.9)                                                                   |
| Ever                                                      | 58,990 (43.4)                                                         | 56,337 (43.1)                                                                   |
| <b>Venturesome personality, n (%)</b>                     |                                                                       |                                                                                 |
| No                                                        | 96,988 (71.4)                                                         | 93,542 (71.5)                                                                   |
| Yes                                                       | 34,087 (25.1)                                                         | 32,644 (25.0)                                                                   |
| <b>Total physical activity (hours/day), n (%)</b>         |                                                                       |                                                                                 |
| ≤ 1                                                       | 20,158 (14.8)                                                         | 19,212 (14.7)                                                                   |
| ≤ 2                                                       | 45,388 (33.4)                                                         | 43,979 (33.6)                                                                   |
| > 2                                                       | 45,390 (33.4)                                                         | 43,839 (33.5)                                                                   |
| <b>DISEASES &amp; DISEASE SYMPTOMS</b>                    |                                                                       |                                                                                 |
| <b>Diabetes, n (%)</b>                                    |                                                                       |                                                                                 |
| No                                                        | 129,609 (95.4)                                                        | 124,850 (95.4)                                                                  |
| Yes                                                       | 6286 (4.6)                                                            | 5957 (4.6)                                                                      |
| <b>Stroke, n (%)</b>                                      |                                                                       |                                                                                 |
| No                                                        | 134,198 (98.7)                                                        | 129,207 (98.8)                                                                  |
| Yes                                                       | 1696 (1.3)                                                            | 1599 (1.2)                                                                      |
| <b>Coronary heart disease, n (%)</b>                      |                                                                       |                                                                                 |
| No                                                        | 130,097 (95.7)                                                        | 125,377 (95.8)                                                                  |
| Yes                                                       | 5797 (4.3)                                                            | 5429 (4.2)                                                                      |
| <b>Hypertension, n (%)</b>                                |                                                                       |                                                                                 |
| No                                                        | 100,883 (74.2)                                                        | 97,450 (74.5)                                                                   |
| Yes                                                       | 35,014 (25.7)                                                         | 33,359 (25.5)                                                                   |
| <b>History of depression, n (%)</b>                       |                                                                       |                                                                                 |
| No                                                        | 121,281 (89.2)                                                        | 116,965 (89.4)                                                                  |
| Yes                                                       | 14,614 (10.8)                                                         | 13,842 (10.6)                                                                   |
| <b>Frequency of depressed mood in last 2 weeks, n (%)</b> |                                                                       |                                                                                 |
| ≤ half the days                                           | 124,873 (91.9)                                                        | 120,528 (92.1)                                                                  |

| Variables                                                                       | Cross-Sectional<br>Analysis<br>N(%) <sup>b</sup> /Median (IQR) | Longitudinal<br>Analysis <sup>a</sup><br>N(%) <sup>b</sup> /Median (IQR) |
|---------------------------------------------------------------------------------|----------------------------------------------------------------|--------------------------------------------------------------------------|
| <b>N<sub>total</sub></b>                                                        | 135,934                                                        | 130,843                                                                  |
| > half the days                                                                 | 5448 (4.0)                                                     | 5004 (3.8)                                                               |
| <b>Tiredness/lethargy in last 2 weeks, n (%)</b>                                |                                                                |                                                                          |
| ≤ half the days                                                                 | 117,967 (86.8)                                                 | 114,150 (87.2)                                                           |
| > half the days                                                                 | 13,967 (10.3)                                                  | 12,860 (9.8)                                                             |
| <b>History of musculoskeletal disease, n (%)</b>                                |                                                                |                                                                          |
| No                                                                              | 63,150 (46.5)                                                  | 62,319 (47.6)                                                            |
| Yes                                                                             | 72,784 (53.5)                                                  | 68,524 (52.4)                                                            |
| <b>History of injury to abdomen, lower back, lumbar spine and pelvis, n (%)</b> |                                                                |                                                                          |
| No                                                                              | 133,260 (98.0)                                                 | 128,459 (98.2)                                                           |
| Yes                                                                             | 2674 (2.0)                                                     | 2384 (1.8)                                                               |
| <b>Cancer, n (%)</b>                                                            |                                                                |                                                                          |
| No                                                                              | 125,650 (92.4)                                                 | 120,951 (92.4)                                                           |
| Yes                                                                             | 9922 (7.3)                                                     | 9548 (7.3)                                                               |
| <b>BIOMARKERS</b>                                                               |                                                                |                                                                          |
| <b>Body mass index (kg/m<sup>2</sup>), n (%)</b>                                |                                                                |                                                                          |
| Underweight, < 18.5                                                             | 709 (0.5)                                                      | 685 (0.5)                                                                |
| Normal weight, 18.5 - <25                                                       | 45,916 (33.8)                                                  | 44,666 (34.1)                                                            |
| Overweight: 25 - < 30                                                           | 57,440 (42.3)                                                  | 55,317 (42.3)                                                            |
| Obesity class: ≥ 30                                                             | 31,368 (23.1)                                                  | 29,703 (22.7)                                                            |
| <b>Systolic blood pressure (mmHg), n (%)</b>                                    |                                                                |                                                                          |
| < 140                                                                           | 70,852 (52.1)                                                  | 68,045 (52.0)                                                            |
| 140 - < 160                                                                     | 43,070 (31.7)                                                  | 41,497 (31.7)                                                            |
| 160 - < 180                                                                     | 17,257 (12.7)                                                  | 16,698 (12.8)                                                            |
| ≥ 180                                                                           | 4590 (3.4)                                                     | 4448 (3.4)                                                               |
| <b>Forced expiratory volume in 1-second (L), median (IQR)</b>                   | 2.8 (2.3; 3.3)                                                 | 2.8 (2.3; 3.3)                                                           |
| <b>Hand grip strength (Kg), median (IQR)</b>                                    | 31 (24; 41)                                                    | 31 (24; 41)                                                              |
| <b>GENERAL HEALTH</b>                                                           |                                                                |                                                                          |
| <b>Disability (%)</b>                                                           |                                                                |                                                                          |
| No                                                                              | 128,905 (94.8)                                                 | 124,728 (95.3)                                                           |
| Yes                                                                             | 6002 (4.4)                                                     | 5165 (4.0)                                                               |
| <b>General self-reported health, n (%)</b>                                      |                                                                |                                                                          |
| Excellent                                                                       | 25,577 (18.8)                                                  | 25,248 (19.3)                                                            |
| Good                                                                            | 80,962 (59.6)                                                  | 78,609 (60.1)                                                            |
| Fair                                                                            | 24,415 (18.0)                                                  | 22,642 (17.3)                                                            |
| Poor                                                                            | 4472 (3.3)                                                     | 3867 (3.0)                                                               |
| <b>No of chronic diseases, median (IQR)</b>                                     | 1 (0; 3)                                                       | 1 (0; 3)                                                                 |
| <b>No of drugs, median (IQR)</b>                                                | 2 (0; 3)                                                       | 2 (0; 3)                                                                 |
| <b>Low-dose aspirin use, n (%)</b>                                              |                                                                |                                                                          |
| No                                                                              | 117,001 (86.1)                                                 | 112,774 (86.2)                                                           |
| Yes                                                                             | 18,893 (13.9)                                                  | 18,032 (13.8)                                                            |
| <b>Lipid-lowering drugs use, n (%)</b>                                          |                                                                |                                                                          |
| No                                                                              | 112,724 (82.9)                                                 | 108,794 (83.2)                                                           |

| Variables                                                  | Cross-Sectional<br>Analysis<br>N(%) <sup>b</sup> /Median (IQR) | Longitudinal<br>Analysis <sup>a</sup><br>N(%) <sup>b</sup> /Median (IQR) |
|------------------------------------------------------------|----------------------------------------------------------------|--------------------------------------------------------------------------|
| N <sub>total</sub>                                         | 135,934                                                        | 130,843                                                                  |
| Yes                                                        | 23,172 (17.1)                                                  | 22,014 (16.8)                                                            |
| <b>Anti-depressants use, n (%)</b>                         |                                                                |                                                                          |
| No                                                         | 128,132 (94.3)                                                 | 123,729 (94.6)                                                           |
| Yes                                                        | 7762 (5.7)                                                     | 7077 (5.4)                                                               |
| <b>VITAMIN D SPECIFIC FACTORS</b>                          |                                                                |                                                                          |
| <b>Latitude of study center (per 1°),<br/>median (IQR)</b> | 53.4 (52.5; 54.6)                                              | 53.4 (52.5; 54.6)                                                        |
| <b>Calendar month of attending the study<br/>center</b>    |                                                                |                                                                          |
| 1                                                          | 10,791 (7.9)                                                   | 10,358 (7.9)                                                             |
| 2-3                                                        | 24,925 (18.3)                                                  | 23,917 (18.3)                                                            |
| 4                                                          | 12,267 (9.0)                                                   | 11,725 (9.0)                                                             |
| 5                                                          | 13,516 (9.9)                                                   | 12,936 (9.9)                                                             |
| 6                                                          | 12,499 (9.2)                                                   | 12,074 (9.2)                                                             |
| 7                                                          | 10,338 (7.6)                                                   | 9977 (7.6)                                                               |
| 8                                                          | 10,705 (7.9)                                                   | 10,362 (7.9)                                                             |
| 9                                                          | 9600 (7.1)                                                     | 9294 (7.1)                                                               |
| 10                                                         | 11,331 (8.3)                                                   | 10,959 (8.4)                                                             |
| 11                                                         | 12,396 (9.1)                                                   | 11,951 (9.1)                                                             |
| 12                                                         | 7566 (5.6)                                                     | 7290 (5.6)                                                               |
| <b>Time spent outdoors in summer<br/>(h/day), n (%)</b>    |                                                                |                                                                          |
| <1                                                         | 5506 (4.1)                                                     | 5281 (4.0)                                                               |
| 1-2                                                        | 40,223 (29.6)                                                  | 39,019 (29.8)                                                            |
| 3-4                                                        | 42,876 (31.5)                                                  | 41,249 (31.5)                                                            |
| 5-6                                                        | 25,682 (18.9)                                                  | 24,675 (18.9)                                                            |
| ≥ 7                                                        | 14,310 (10.5)                                                  | 13,621 (10.4)                                                            |
| <b>Skin color, n (%)</b>                                   |                                                                |                                                                          |
| Light (fair - olive)                                       | 127800 (94.0)                                                  | 123,111 (94.1)                                                           |
| Brown                                                      | 2428 (1.8)                                                     | 2319 (1.8)                                                               |
| Black                                                      | 3167 (2.3)                                                     | 3006 (2.3)                                                               |
| <b>Ease of skin tanning, n (%)</b>                         |                                                                |                                                                          |
| Very tanned                                                | 27,287 (20.1)                                                  | 26,106 (20.0)                                                            |
| Moderately tanned                                          | 53,107 (39.1)                                                  | 51,233 (39.2)                                                            |
| Mildly/occasionally tanned                                 | 28,599 (21.0)                                                  | 27,589 (21.1)                                                            |
| Never tan, only burn                                       | 23,537 (17.3)                                                  | 22,653 (17.3)                                                            |
| <b>Solarium/sunlamp use (times per<br/>year), n (%)</b>    |                                                                |                                                                          |
| Never                                                      | 121,854 (89.6)                                                 | 117,433 (89.8)                                                           |
| < 1                                                        | 6652 (4.9)                                                     | 6385 (4.9)                                                               |
| 1 - 6                                                      | 3316 (2.4)                                                     | 3143 (2.4)                                                               |
| 7 - 12                                                     | 1450 (1.1)                                                     | 1374 (1.1)                                                               |
| > 12                                                       | 1386 (1.0)                                                     | 1308 (1.0)                                                               |

Abbreviations: IQR: interquartile range.

<sup>a</sup> Population with low back pain before/at baseline not included.

<sup>b</sup> Denominators in proportion calculations contain missing values

**Table S3.** Cross-sectional association of covariates with low back pain at baseline.

| <b>Variable</b>                                               | <b>OR (95%CI)</b> |
|---------------------------------------------------------------|-------------------|
| <b>SOCIO-DEMOGRAPHIC/<br/>-ECONOMIC FACTORS</b>               |                   |
| <b>Age (years), median (IQR)</b>                              | 0.98 (0.98, 0.99) |
| <b>Sex, n (%)</b>                                             |                   |
| Female                                                        | Ref               |
| Male                                                          | 0.75 (0.68, 0.83) |
| <b>Education (years), median (IQR)</b>                        | 0.96 (0.95, 0.97) |
| <b>Annual household income (£), n (%)</b>                     |                   |
| < 18,000                                                      | Ref               |
| 18,000 - < 51,999                                             | 0.93 (0.86, 1.00) |
| 52,000 - < 100,000                                            | 0.85 (0.76, 0.96) |
| ≥ 100,000                                                     | 0.78 (0.63, 0.96) |
| <b>LIFESTYLE FACTORS</b>                                      |                   |
| <b>Smoking, n (%)</b>                                         |                   |
| Never                                                         | Ref               |
| Ever                                                          | 1.34 (1.22, 1.47) |
| <b>Venturesome personality, n (%)</b>                         |                   |
| No                                                            | Ref               |
| Yes                                                           | 1.12 (1.05, 1.20) |
| <b>Total physical activity (hours/day), n (%)</b>             |                   |
| ≤ 1                                                           | Ref               |
| ≤ 2                                                           | 0.88 (0.81, 0.96) |
| > 2                                                           | 0.96 (0.87, 1.06) |
| <b>DISEASES &amp; DISEASE<br/>SYMPTOMS</b>                    |                   |
| <b>Diabetes, n (%)</b>                                        |                   |
| No                                                            | Ref               |
| Yes                                                           | 0.80 (0.75, 0.85) |
| <b>Stroke, n (%)</b>                                          |                   |
| No                                                            | Ref               |
| Yes                                                           | 0.64 (0.51, 0.81) |
| <b>Coronary heart disease, n (%)</b>                          |                   |
| No                                                            | Ref               |
| Yes                                                           | 0.81 (0.71, 0.93) |
| <b>Hypertension, n (%)</b>                                    |                   |
| No                                                            | Ref               |
| Yes                                                           | 0.80 (0.74, 0.87) |
| <b>History of depression, n (%)</b>                           |                   |
| No                                                            | Ref               |
| Yes                                                           | 0.81 (0.74, 0.89) |
| <b>Frequency of depressed mood in last<br/>2 weeks, n (%)</b> |                   |
| ≤ half the days                                               | Ref               |
| > half the days                                               | 1.16 (1.03, 1.31) |

| Variable                                                                        | OR (95%CI)        |
|---------------------------------------------------------------------------------|-------------------|
| <b>Tiredness/lethargy in last 2 weeks, n (%)</b>                                |                   |
| ≤ half the days                                                                 | Ref               |
| > half the days                                                                 | 1.23 (1.13, 1.34) |
| <b>History of musculoskeletal disease, n (%)</b>                                |                   |
| No                                                                              | Ref               |
| Yes                                                                             | 3.79 (3.51, 4.09) |
| <b>History of injury to abdomen, lower back, lumbar spine and pelvis, n (%)</b> |                   |
| No                                                                              | Ref               |
| Yes                                                                             | 2.24 (1.96, 2.56) |
| <b>Cancer, n (%)</b>                                                            |                   |
| No                                                                              | Ref               |
| Yes                                                                             | 0.75 (0.67, 0.84) |
| <b>BIOMARKERS</b>                                                               |                   |
| <b>Body mass index (kg/m<sup>2</sup>), n (%)</b>                                |                   |
| Underweight, < 18.5                                                             | 0.95 (0.62, 1.46) |
| Normal weight, 18.5 - < 25                                                      | Ref               |
| Overweight: 25 - < 30                                                           | 1.13 (1.05, 1.22) |
| Obesity class: ≥ 30                                                             | 1.13 (1.04, 1.23) |
| <b>Systolic blood pressure (mmHg), n (%)</b>                                    |                   |
| < 140                                                                           | Ref               |
| 140 - < 160                                                                     | 0.89 (0.83, 0.96) |
| 160 - < 180                                                                     | 0.80 (0.72, 0.88) |
| ≥ 180                                                                           | 0.81 (0.68, 0.97) |
| <b>Forced expiratory volume in 1-second (L), median (IQR)</b>                   | 1.07 (1.02, 1.13) |
| <b>Hand grip strength (Kg), median (IQR)</b>                                    | 1.20 (1.14, 1.25) |
| <b>GENERAL HEALTH</b>                                                           |                   |
| <b>Disability (%)</b>                                                           |                   |
| No                                                                              | Ref               |
| Yes                                                                             | 1.76 (1.59, 1.95) |
| <b>General self-reported health, n (%)</b>                                      |                   |
| Excellent                                                                       | Ref               |
| Good                                                                            | 1.85 (1.65, 2.09) |
| Fair                                                                            | 3.36 (2.96, 3.82) |
| Poor                                                                            | 3.53 (2.98, 4.19) |
| <b>No of chronic diseases, median (IQR)</b>                                     | 1.11 (1.09, 1.13) |
| <b>No of drugs, median (IQR)</b>                                                | 1.10 (1.09, 1.12) |
| <b>Low-dose aspirin use, n (%)</b>                                              |                   |
| No                                                                              | Ref               |
| Yes                                                                             | 0.88 (0.80, 0.97) |
| <b>Lipid-lowering drugs use, n (%)</b>                                          |                   |

| <b>Variable</b>                                     | <b>OR (95%CI)</b> |
|-----------------------------------------------------|-------------------|
| No                                                  | Ref               |
| Yes                                                 | 0.86 (0.78, 0.94) |
| <b>Anti-depressants use, n (%)</b>                  |                   |
| No                                                  | Ref               |
| Yes                                                 | 1.17 (1.06, 1.30) |
| <b>VITAMIN D SPECIFIC FACTORS</b>                   |                   |
| <b>Latitude of study center (per 1°), median</b>    | 0.88 (0.86, 0.90) |
| <b>Calendar month of attending the study center</b> |                   |
| 1                                                   | Ref               |
| 2-3                                                 | 0.98 (0.87, 1.10) |
| 4                                                   | 1.09 (0.95, 1.24) |
| 5                                                   | 1.02 (0.90, 1.17) |
| 6                                                   | 0.82 (0.71, 0.94) |
| 7                                                   | 0.82 (0.71, 0.95) |
| 8                                                   | 0.77 (0.67, 0.90) |
| 9                                                   | 0.79 (0.68, 0.92) |
| 10                                                  | 0.82 (0.71, 0.95) |
| 11                                                  | 0.93 (0.81, 1.07) |
| 12                                                  | 0.94 (0.80, 1.10) |
| <b>Time spent outdoors in summer (h/day), n (%)</b> |                   |
| <1                                                  | Ref               |
| 1-2                                                 | 0.95 (0.82, 1.11) |
| 3-4                                                 | 1.13 (0.96, 1.32) |
| 5-6                                                 | 1.13 (0.96, 1.32) |
| ≥ 7                                                 | 1.30 (1.10, 1.54) |
| <b>Skin color, n (%)</b>                            |                   |
| Light (fair - olive)                                | Ref               |
| Brown                                               | 1.23 (1.03, 1.47) |
| Black                                               | 1.15 (0.80, 1.66) |
| <b>Ease of skin tanning, n (%)</b>                  |                   |
| Very tanned                                         | Ref               |
| Moderately tanned                                   | 0.94 (0.87, 1.01) |
| Mildly/occasionally tanned                          | 0.93 (0.85, 1.02) |
| Never tan, only burn                                | 0.91 (0.83, 1.00) |
| <b>Solarium/sunlamp use (times per year), n (%)</b> |                   |
| Never                                               | Ref               |
| < 1                                                 | 1.10 (0.97, 1.26) |
| 1 - 6                                               | 1.35 (1.14, 1.59) |
| 7 - 12                                              | 1.37 (1.07, 1.75) |
| > 12                                                | 1.39 (1.09, 1.77) |

Abbreviation: CI: confidence interval, OR: odds ratio, Ref: reference.



**Table S4.** Subgroup analyses on the associations of vitamin D deficiency and insufficiency with low back pain, cross-sectionally and longitudinally.

| Study population                             | Cross-sectional analyses |                       |                       |                      |                       |               | Longitudinal analyses |                         |                       |                      |                       |               |
|----------------------------------------------|--------------------------|-----------------------|-----------------------|----------------------|-----------------------|---------------|-----------------------|-------------------------|-----------------------|----------------------|-----------------------|---------------|
|                                              | Vitamin D status         |                       |                       |                      |                       |               | Vitamin D status      |                         |                       |                      |                       |               |
|                                              | Deficiency               |                       | Insufficiency         |                      | Sufficiency           |               | Deficiency            |                         | Insufficiency         |                      | Sufficiency           |               |
|                                              | N <sub>case</sub> (%)    | OR<br>(95%CI)         | N <sub>case</sub> (%) | OR<br>(95%CI)        | N <sub>case</sub> (%) | OR<br>(95%CI) | N <sub>case</sub> (%) | HR (95%CI)              | N <sub>case</sub> (%) | HR<br>(95%CI)        | N <sub>case</sub> (%) | HR<br>(95%CI) |
| <b>By age</b>                                |                          |                       |                       |                      |                       |               |                       |                         |                       |                      |                       |               |
| <65 years                                    | 1039<br>(4.1)            | 0.94<br>(0.86, 1.03)  | 1452<br>(3.8)         | 0.98<br>(0.90, 1.05) | 1722<br>(3.7)         | Ref           | 755<br>(3.1)          | 0.87<br>(0.79, 0.97) ** | 1255<br>(3.4)         | 1.00<br>(0.92, 1.08) | 1481<br>(3.3)         | Ref           |
| ≥65 years                                    | 164<br>(3.9)             | 1.00<br>(0.81, 1.23)  | 289<br>(3.4)          | 0.95<br>(0.81, 1.12) | 425<br>(3.4)          | Ref           | 119<br>(3.0)          | 0.85<br>(0.68, 1.07)    | 278<br>(3.4)          | 0.99<br>(0.85, 1.17) | 400<br>(3.3)          | Ref           |
| <b>By sex</b>                                |                          |                       |                       |                      |                       |               |                       |                         |                       |                      |                       |               |
| Females                                      | 657<br>(4.1)             | 0.97<br>(0.87, 1.09)  | 925<br>(3.7)          | 0.97<br>(0.88, 1.07) | 1155<br>(3.6)         | Ref           | 487<br>(3.2)          | 0.93<br>(0.82, 1.05)    | 841<br>(3.5)          | 1.05<br>(0.96, 1.16) | 1007<br>(3.2)         | Ref           |
| Males                                        | 546<br>(4.0)             | 0.93<br>(0.81, 1.05)  | 816<br>(3.8)          | 0.97<br>(0.88, 1.08) | 992<br>(3.65)         | Ref           | 387<br>(3.0)          | 0.82<br>(0.71, 0.94)    | 692<br>(3.3)          | 0.94 (0.85,<br>1.05) | 874<br>(3.3)          | Ref           |
| <b>By history of depression</b>              |                          |                       |                       |                      |                       |               |                       |                         |                       |                      |                       |               |
| Yes                                          | 179<br>(5.6)             | 0.76<br>(0.61,0.96) * | 270<br>(5.4)          | 0.91<br>(0.75, 1.09) | 324<br>(5.0)          | Ref           | 108<br>(3.6)          | 0.85<br>(0.65, 1.11)    | 166<br>(3.5)          | 0.90<br>(0.73, 1.11) | 233<br>(3.8)          | Ref           |
| No                                           | 1024<br>(3.9)            | 0.98<br>(0.90, 1.08)  | 1471<br>(3.5)         | 0.98<br>(0.91, 1.06) | 1823<br>(3.4)         | Ref           | 766<br>(3.0)          | 0.88<br>(0.79, 0.97) *  | 1367<br>(3.4)         | 1.01<br>(0.94, 1.09) | 1648<br>(3.2)         | Ref           |
| <b>By history of musculoskeletal disease</b> |                          |                       |                       |                      |                       |               |                       |                         |                       |                      |                       |               |
| Yes                                          | 994<br>(6.9)             | 0.97<br>(0.88, 1.07)  | 1455<br>(5.9)         | 0.99<br>(0.91, 1.06) | 1811<br>(5.4)         | Ref           | 532<br>(4.0)          | 0.90<br>(0.80, 1.01)    | 971<br>(4.2)          | 1.01<br>(0.92, 1.10) | 1242<br>(3.9)         | Ref           |
| No                                           | 209<br>(1.4)             | 0.84<br>(0.69, 1.03)  | 286<br>(1.3)          | 0.90<br>(0.76, 1.07) | 336<br>(1.3)          | Ref           | 342<br>(2.3)          | 0.82<br>(0.70, 0.95) *  | 562<br>(2.6)          | 0.98<br>(0.87, 1.10) | 639<br>(2.5)          | Ref           |

Abbreviation: CI: confidence interval, HR: hazard ratio, OR: odds ratio, Ref: reference.

\* p<0.05, \*\* p<0.001. No results were statistically significant after correction for multiple testing with Bonferroni's method for the n=64 tests conducted for the subgroup analyses shown in Suppl. Table S4 and S5.

<sup>a</sup> Subgroup analyses adjusted for all covariates listed in **Table S1 (Suppl. Material)**, except for the one used for categorizing subgroups.

**Table S5.** Subgroup analyses on the associations of vitamin D supplement and multivitamin use with low back pain, cross-sectionally and longitudinally.

| Study population                             | Cross-sectional analyses |                            |                       |                            |                       |                      | Longitudinal analyses  |                            |                       |                            |                       |                            |
|----------------------------------------------|--------------------------|----------------------------|-----------------------|----------------------------|-----------------------|----------------------|------------------------|----------------------------|-----------------------|----------------------------|-----------------------|----------------------------|
|                                              | Vitamin supplement use   |                            |                       |                            |                       |                      | Vitamin supplement use |                            |                       |                            |                       |                            |
|                                              | Non-users                |                            | Multivitamin          |                            | Vitamin D             |                      | Non-users              |                            | Multivitamin          |                            | Vitamin D             |                            |
|                                              | N <sub>case</sub> (%)    | OR <sup>a</sup><br>(95%CI) | N <sub>case</sub> (%) | OR <sup>a</sup><br>(95%CI) | N <sub>case</sub> (%) | OR<br>(95%CI)        | N <sub>case</sub> (%)  | HR <sup>a</sup><br>(95%CI) | N <sub>case</sub> (%) | HR <sup>a</sup><br>(95%CI) | N <sub>case</sub> (%) | HR <sup>a</sup><br>(95%CI) |
| <b>By age</b>                                |                          |                            |                       |                            |                       |                      |                        |                            |                       |                            |                       |                            |
| <65 years                                    | 3173<br>(3.8)            | Ref                        | 848<br>(3.8)          | 0.96<br>(0.88, 1.04)       | 192<br>(4.6)          | 0.96<br>(0.82, 1.13) | 2658<br>(3.3)          | Ref                        | 706<br>(3.3)          | 0.99<br>(0.91, 1.08)       | 127<br>(3.2)          | 0.95<br>(0.79, 1.14)       |
| ≥65 years                                    | 651<br>(3.4)             | Ref                        | 167<br>(3.6)          | 1.06<br>(0.88, 1.27)       | 60<br>(4.8)           | 1.20<br>(0.90, 1.60) | 611 (3.3)              | Ref                        | 147<br>(3.3)          | 0.99<br>(0.82, 1.19)       | 39<br>(3.3)           | 0.95<br>(0.68, 1.32)       |
| <b>By sex</b>                                |                          |                            |                       |                            |                       |                      |                        |                            |                       |                            |                       |                            |
| Females                                      | 1969<br>(3.7)            | Ref                        | 597<br>(3.7)          | 0.93<br>(0.84, 1.03)       | 171<br>(4.45)         | 0.96<br>(0.81, 1.14) | 1704<br>(3.3)          | Ref                        | 515<br>(3.3)          | 0.96<br>(0.87, 1.06)       | 116<br>(3.2)          | 0.92<br>(0.76, 1.11)       |
| Males                                        | 1855<br>(3.7)            | Ref                        | 418<br>(4.0)          | 1.04<br>(0.93, 1.17)       | 81<br>(5.1)           | 1.11<br>(0.87, 1.41) | 1565<br>(3.2)          | Ref                        | 338<br>(3.4)          | 1.04<br>(0.92, 1.17)       | 50<br>(3.3)           | 1.01<br>(0.76, 1.34)       |
| <b>By history of depression</b>              |                          |                            |                       |                            |                       |                      |                        |                            |                       |                            |                       |                            |
| Yes                                          | 575<br>(5.4)             | Ref                        | 159<br>(4.9)          | 0.94<br>(0.78, 1.14)       | 39<br>(5.7)           | 0.84<br>(0.58, 1.20) | 367<br>(3.6)           | Ref                        | 109<br>(3.5)          | 0.97<br>(0.78, 1.21)       | 31<br>(4.8)           | 1.25<br>(0.86, 1.83)       |
| No                                           | 3249<br>(3.5)            | Ref                        | 856<br>(3.6)          | 0.99<br>(0.91, 1.07)       | 213<br>(4.5)          | 1.05<br>(0.90, 1.22) | 2902<br>(3.2)          | Ref                        | 744<br>(3.3)          | 0.99<br>(0.91, 1.08)       | 135<br>(3.0)          | 0.89<br>(0.75, 1.07)       |
| <b>By history of musculoskeletal disease</b> |                          |                            |                       |                            |                       |                      |                        |                            |                       |                            |                       |                            |
| Yes                                          | 3173<br>(5.8)            | Ref                        | 863<br>(5.9)          | 1.01<br>(0.93, 1.10)       | 224<br>(6.8)          | 1.05<br>(0.90, 1.22) | 2090<br>(4.0)          | Ref                        | 537<br>(3.9)          | 0.96<br>(0.88, 1.06)       | 118<br>(3.8)          | 0.96<br>(0.79, 1.15)       |
| No                                           | 651<br>(1.3)             | Ref                        | 152<br>(1.2)          | 0.84<br>(0.70, 1.00)       | 28<br>(1.3)           | 0.82<br>(0.56, 1.22) | 1179<br>(2.5)          | Ref                        | 316<br>(2.6)          | 1.04<br>(0.92, 1.19)       | 48<br>(2.3)           | 0.93<br>(0.69, 1.25)       |

Abbreviation: CI: confidence interval, HR: hazard ratio, OR: odds ratio, Ref: reference.

<sup>a</sup> Subgroup analyses adjusted for all covariates listed in **Table S1 (Suppl. Material)**, except for the one used for categorizing subgroups.
